# Supplementary material for: A Case Series Study of Help-Seeking among Younger and Older Men in Suicidal Crisis
Source: Preprints.org preprint supplement (doi:10.20944/preprints202105.0632.v1), 2021-05-26
Supplement: Supplementary file 1 [file supplementary]

**Table A – I MV Model factors**

| I MV Model factor                   | 18-30<br>(N = 161) | 31+<br>(N=176) | Significance<br>against Core |
|-------------------------------------|--------------------|----------------|------------------------------|
| Defeat                              | 47 (33 %)          | 82 (52 %)      | .01*                         |
| <i>At discharge</i>                 | 9 (6 %)            | 14 (8 %)       | .90                          |
| Hopelessness                        | 16 (11 %)          | 15 (10 %)      | .98                          |
| <i>At discharge</i>                 | 1 (1 %)            | 0              | .96                          |
| Humiliation                         | 73 (51 %)          | 105 (67 %)     | .64                          |
| <i>At discharge</i>                 | 12 (8 %)           | 28 (18 %)      | .76                          |
| Entrapment                          | 65 (46 %)          | 97 (62 %)      | .02*                         |
| <i>At discharge</i>                 | 19 (14 %)          | 26 (17 %)      | .01*                         |
| Social problemsolving               | 31 (22 %)          | 43 (27 %)      | .61                          |
| <i>At discharge</i>                 | 27 (19 %)          | 48 (31 %)      | .71                          |
| Coping                              | 27 (19 %)          | 38 (24 %)      | .86                          |
| <i>At discharge</i>                 | 70 (49 %)          | 80 (51 %)      | .48                          |
| Memory Bases                        | 54 (38 %)          | 79 (50 %)      | .07                          |
| Rumination                          | 110 (77 %)         | 123 (78 %)     | .82                          |
| <i>At discharge</i>                 | 45 (32 %)          | 63 (40 %)      | .44                          |
| Thwarted Belongingness              | 101 (71 %)         | 111 (71 %)     | .40                          |
| <i>At discharge</i>                 | 40 (28 %)          | 47 (30 %)      | .16                          |
| Burdensomeness                      | 67 (47 %)          | 77 (49 %)      | .74                          |
| <i>At discharge</i>                 | 0                  | 0              | .06                          |
| Absence of positive future thinking | 66 (47 %)          | 87 (44 %)      | .41                          |
| <i>At discharge</i>                 | 11 (8 %)           | 23 (15 %)      | .03*                         |
| Unrealistic goals                   | 20 (14 %)          | 21 (14 %)      | .79                          |
| <i>At discharge</i>                 | 12 (9 %)           | 9 (6 %)        | .12                          |
| Not engaging in new goals           | 53 (38 %)          | 73 (47 %)      | .02*                         |
| <i>At discharge</i>                 | 19 (14 %)          | 27 (18 %)      | .33                          |
| Social norms                        | 7 (5 %)            | 14 (9 %)       | .73                          |
| Resilience                          | 20 (14 %)          | 38 (25 %)      | .82                          |
| <i>At discharge</i>                 | 43 (31 %)          | 64 (42 %)      | .21                          |
| Social support                      | 66 (47 %)          | 82 (53 %)      | .12                          |
| <i>At discharge</i>                 | 47 (33 %)          | 69 (45 %)      | .02*                         |
| Social isolation                    | 12 (9 %)           | 6 (4 %)        | .69                          |
| Positive attitudes towards suicide  | 19 (14 %)          | 28 (18 %)      | .001*                        |
| Suicide plan                        | 18 (13 %)          | 14 (9 %)       | .45                          |
| <i>At discharge</i>                 | 1 (1 %)            | 4 (3 %)        | .09                          |
| Exposure to suicidality             | 42 (30 %)          | 60 (39 %)      | .91                          |
| Impulsivity                         | 62 (44 %)          | 79 (51 %)      | .95                          |
| Pain tolerance                      | 12 (9 %)           | 23 (15 %)      | .47                          |
| Fearlessness of death               | 18 (13 %)          | 30 (20 %)      | .07                          |
| Imagery of death/suicide            | 50 (36 %)          | 53 (34 %)      | .73                          |
| <i>At discharge</i>                 | 12 (9 %)           | 16 (10 %)      | .71                          |
| Past suicide attempt or self-harm   | 113 (75 %)         | 121 (74 %)     | .35                          |

\*p&lt; .05
